# Supplementary material
Source: PubMed Central journal article supplement (PMC7744368)
Supplement: NIHMS1632398-supplement-1.pdf [file NIHMS1632398-supplement-1.pdf]

# Supplemental Figure 1

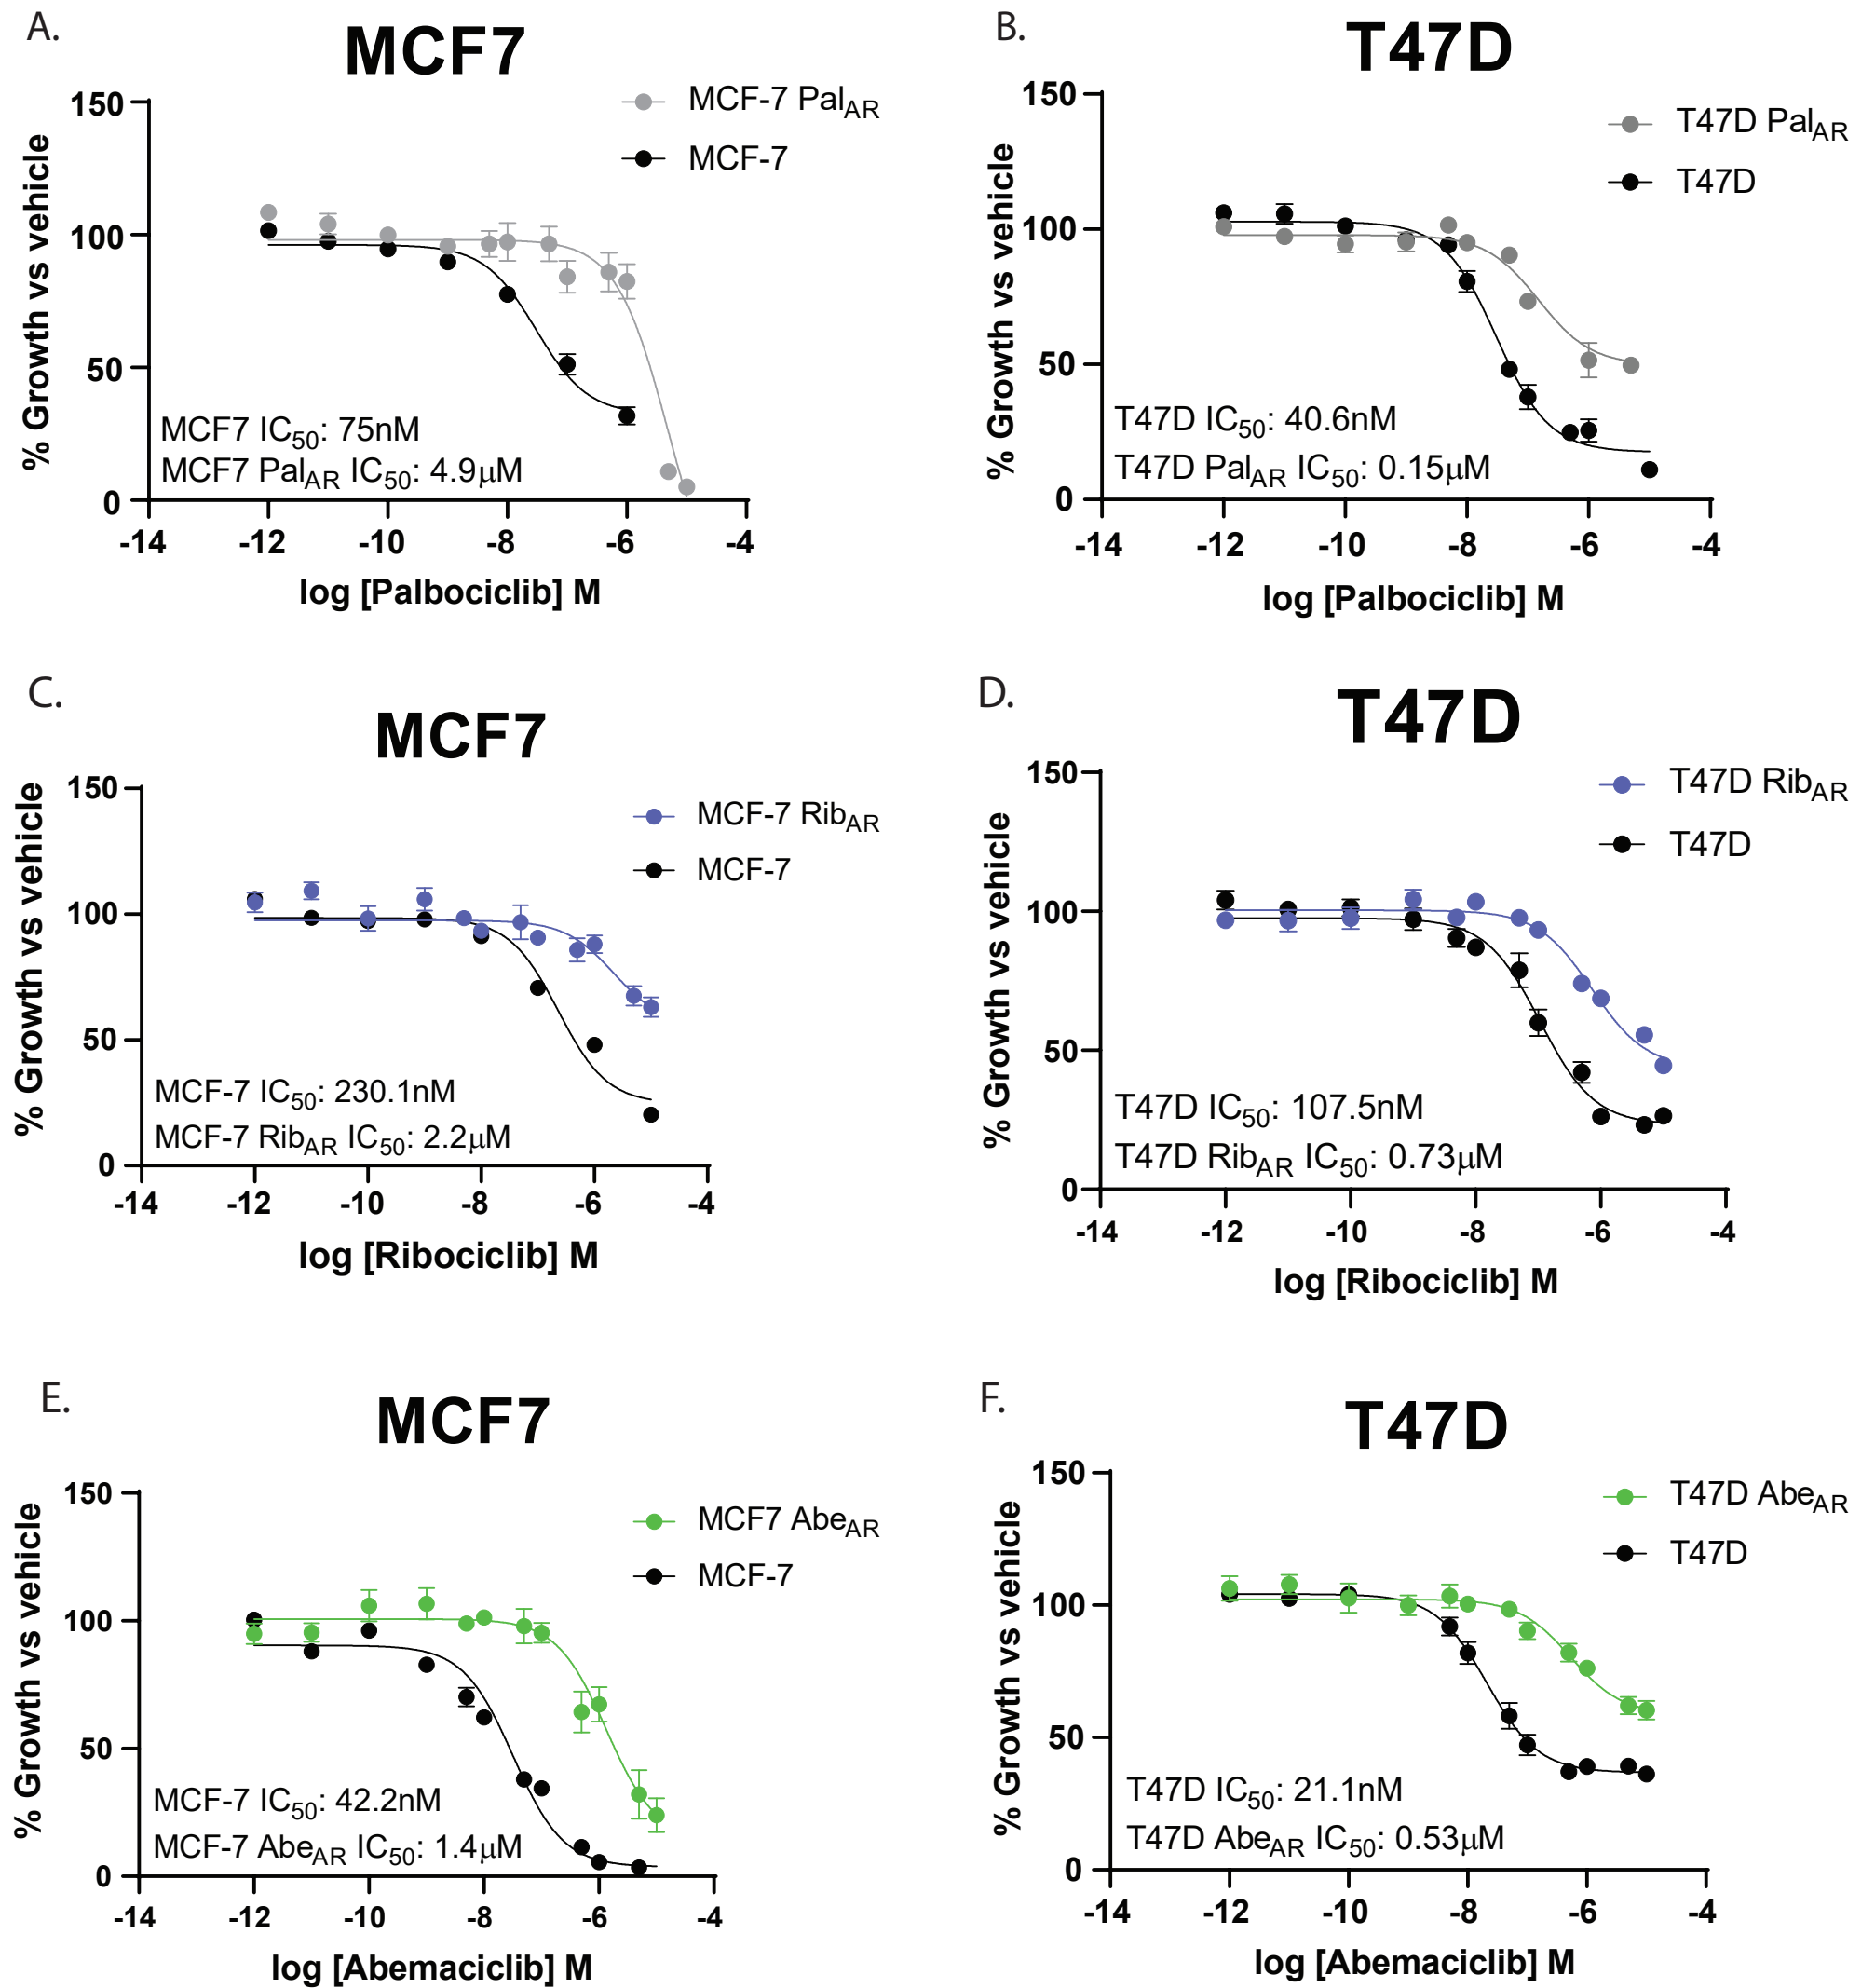

# Supplemental Figure 2

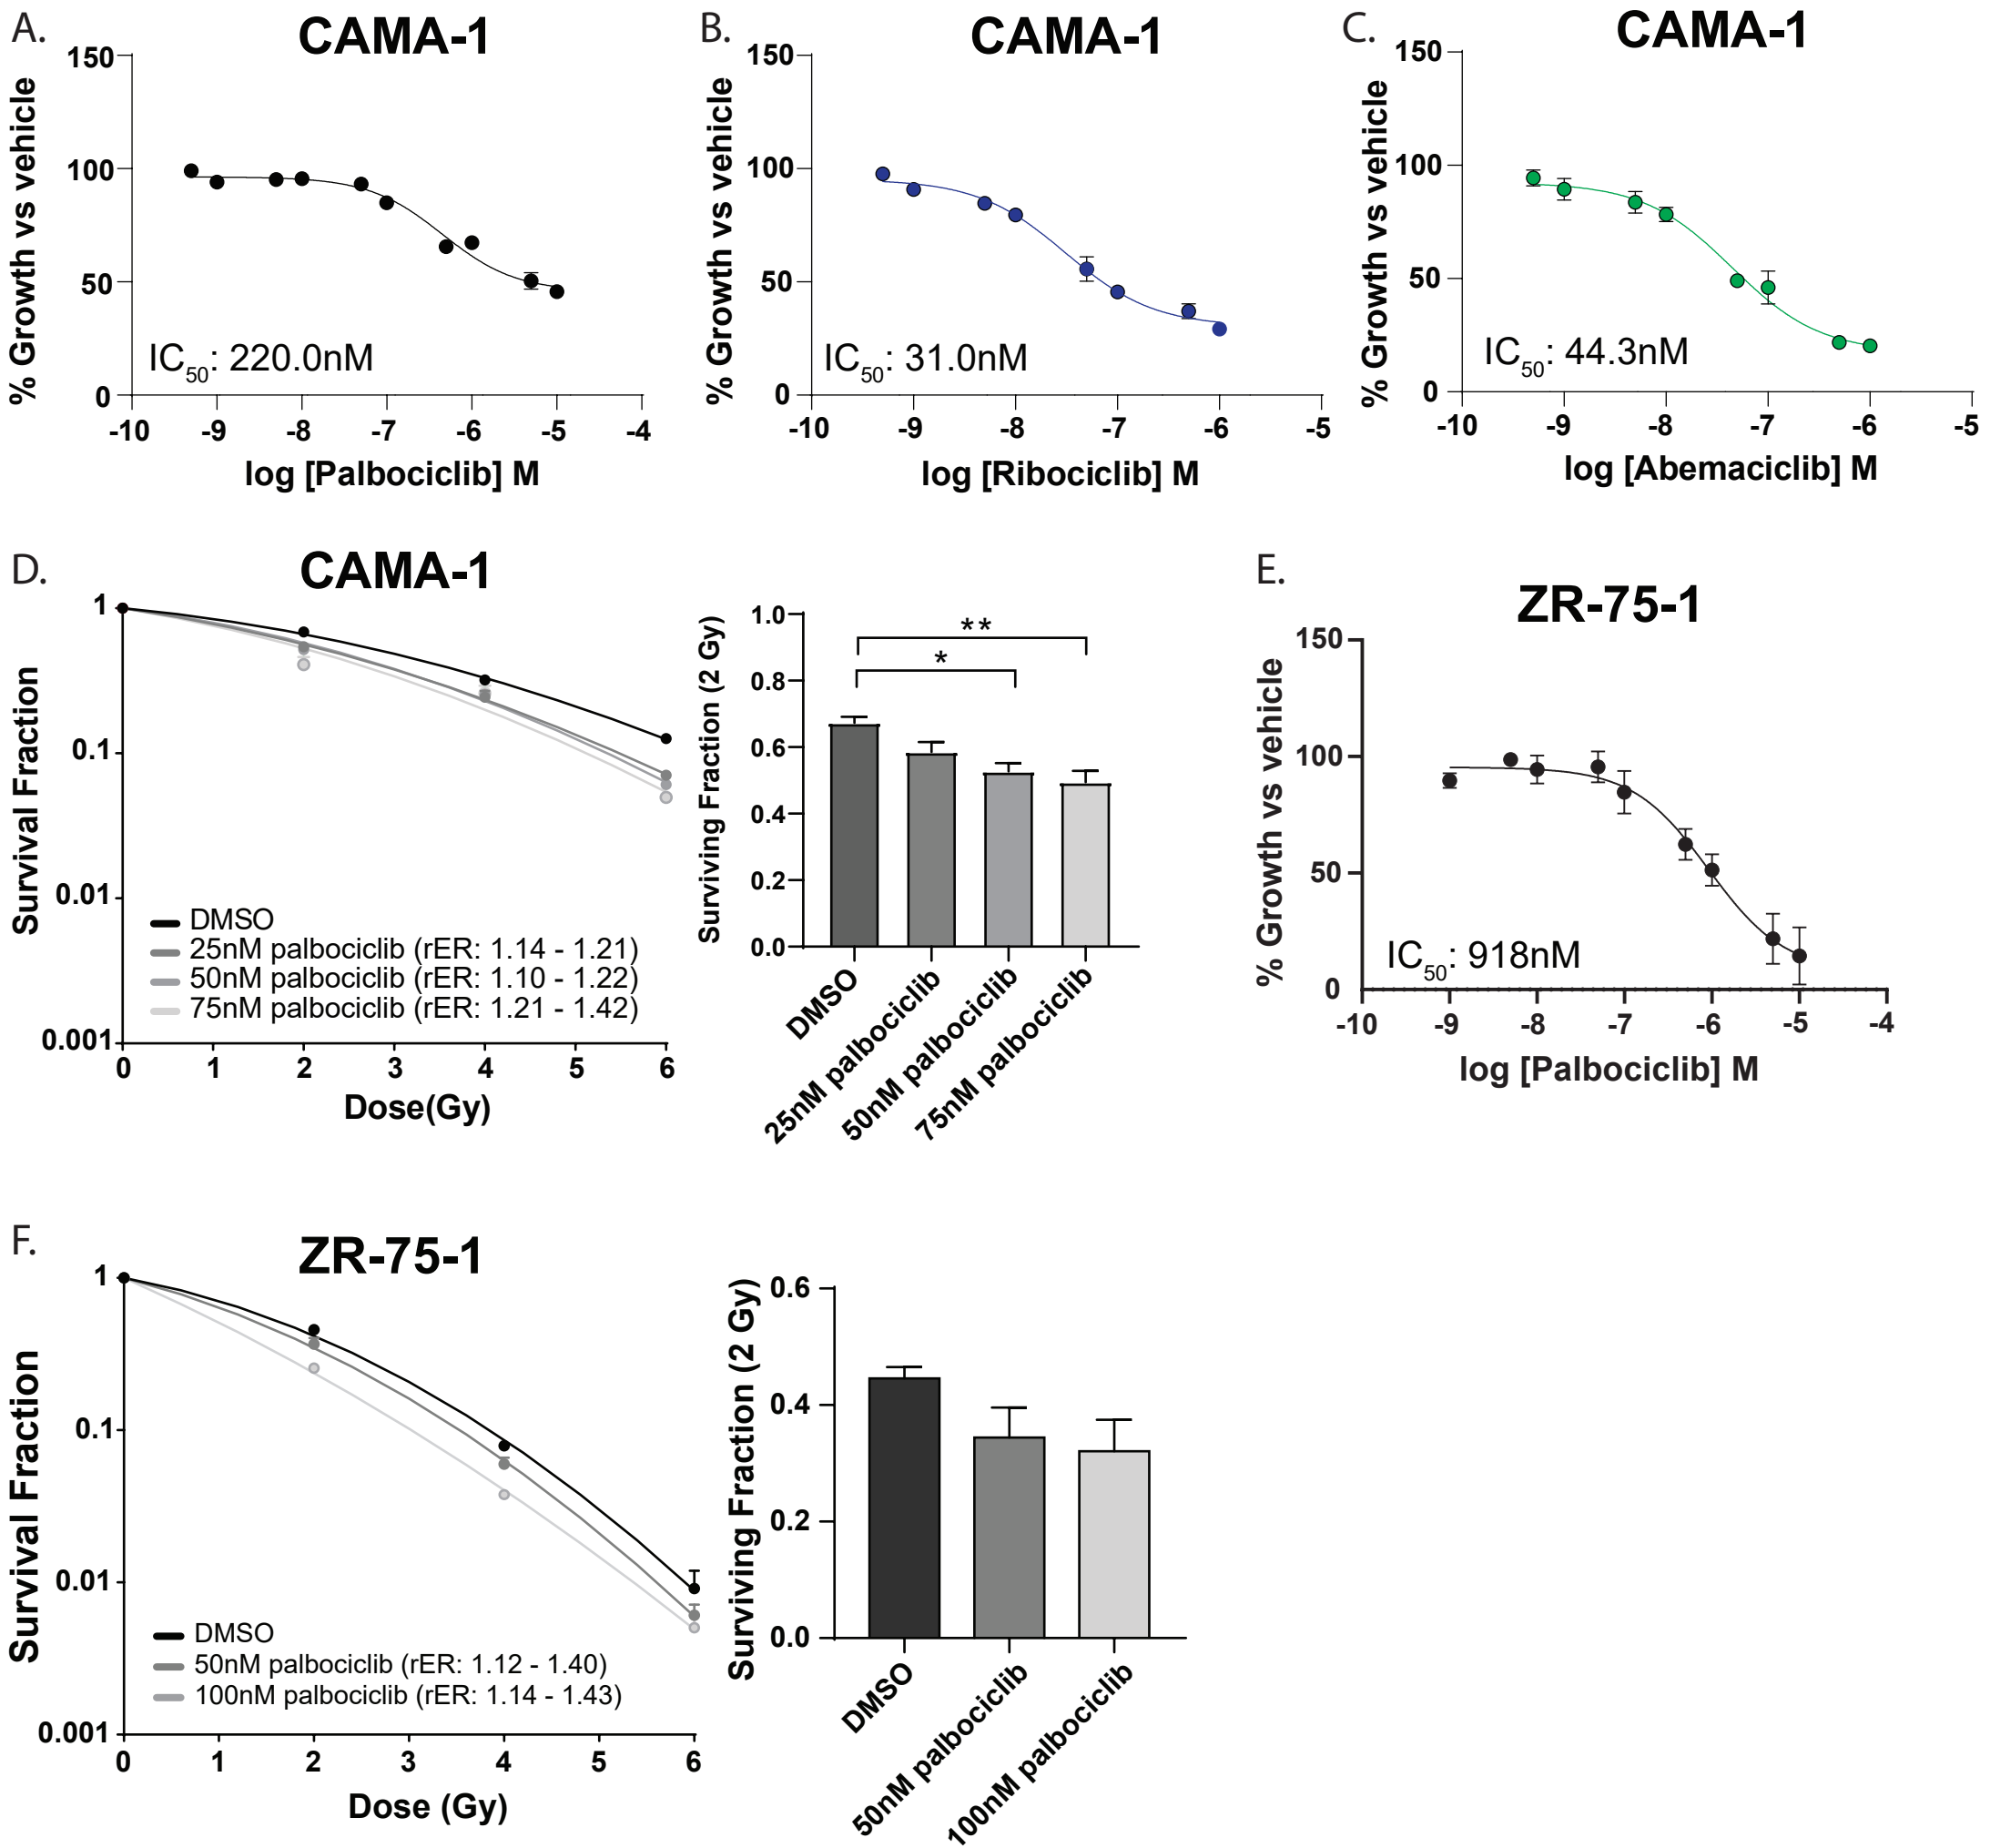

# Supplemental Figure 3

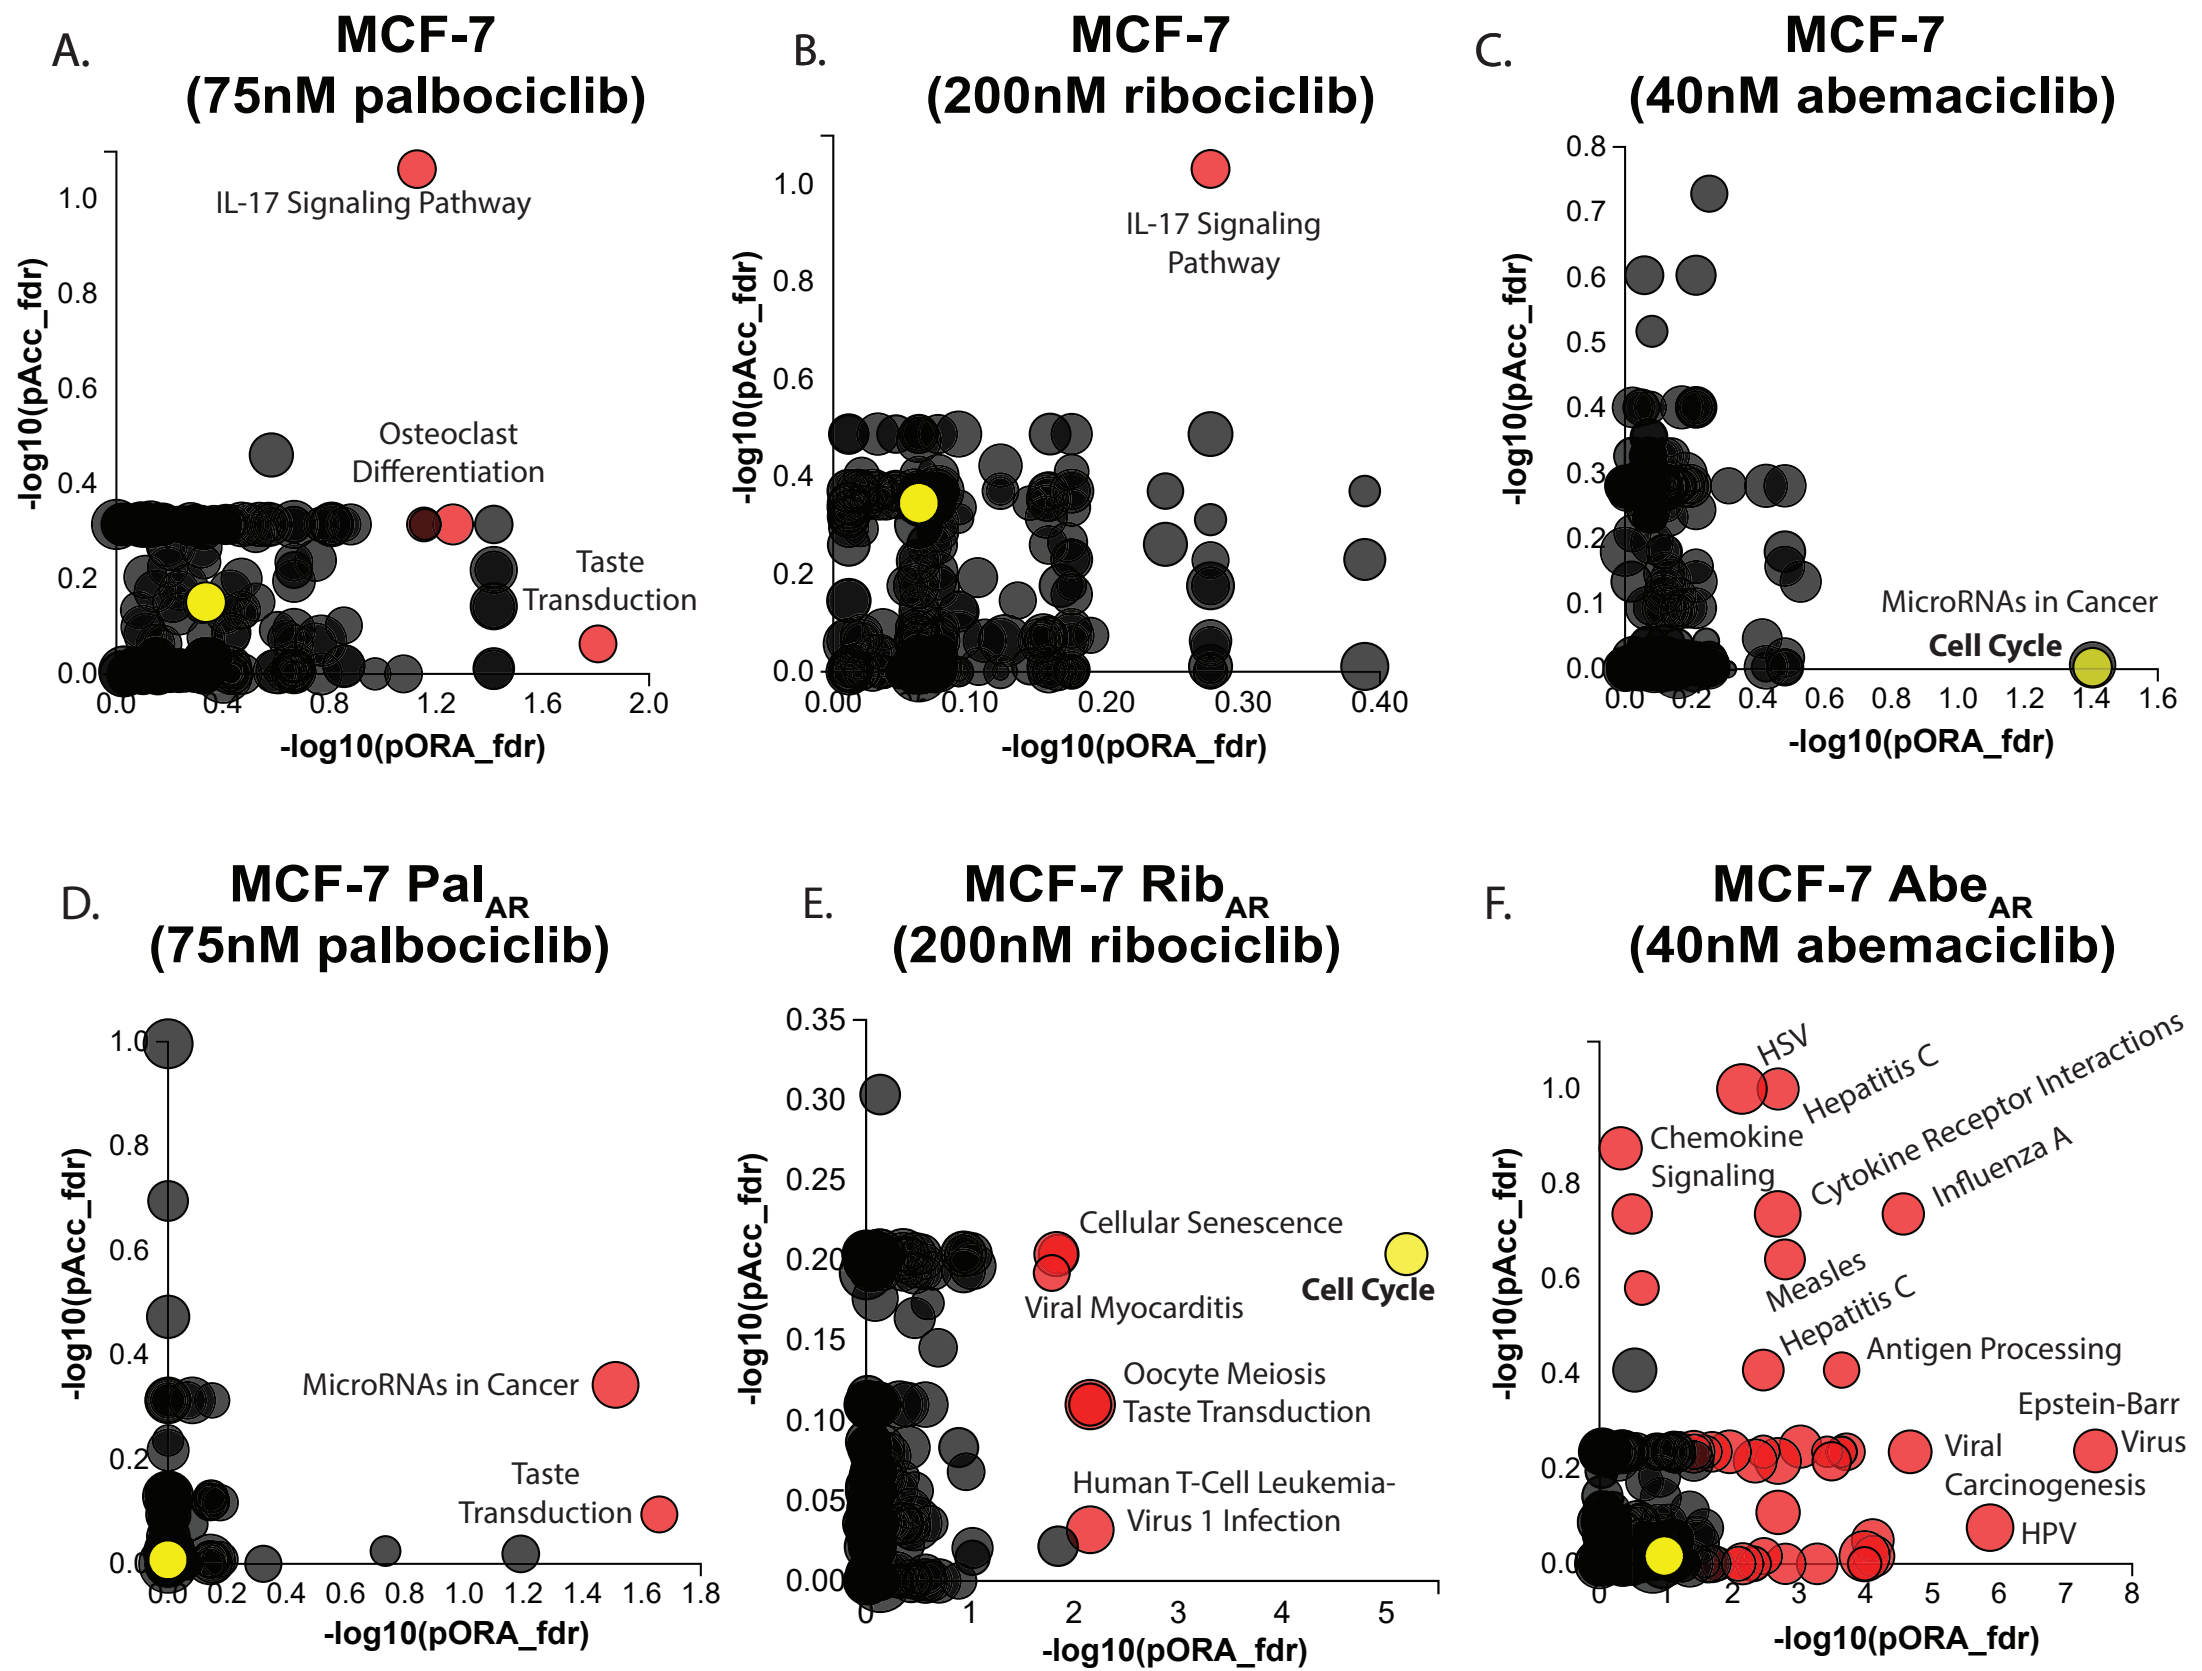

# Supplemental Figure 4

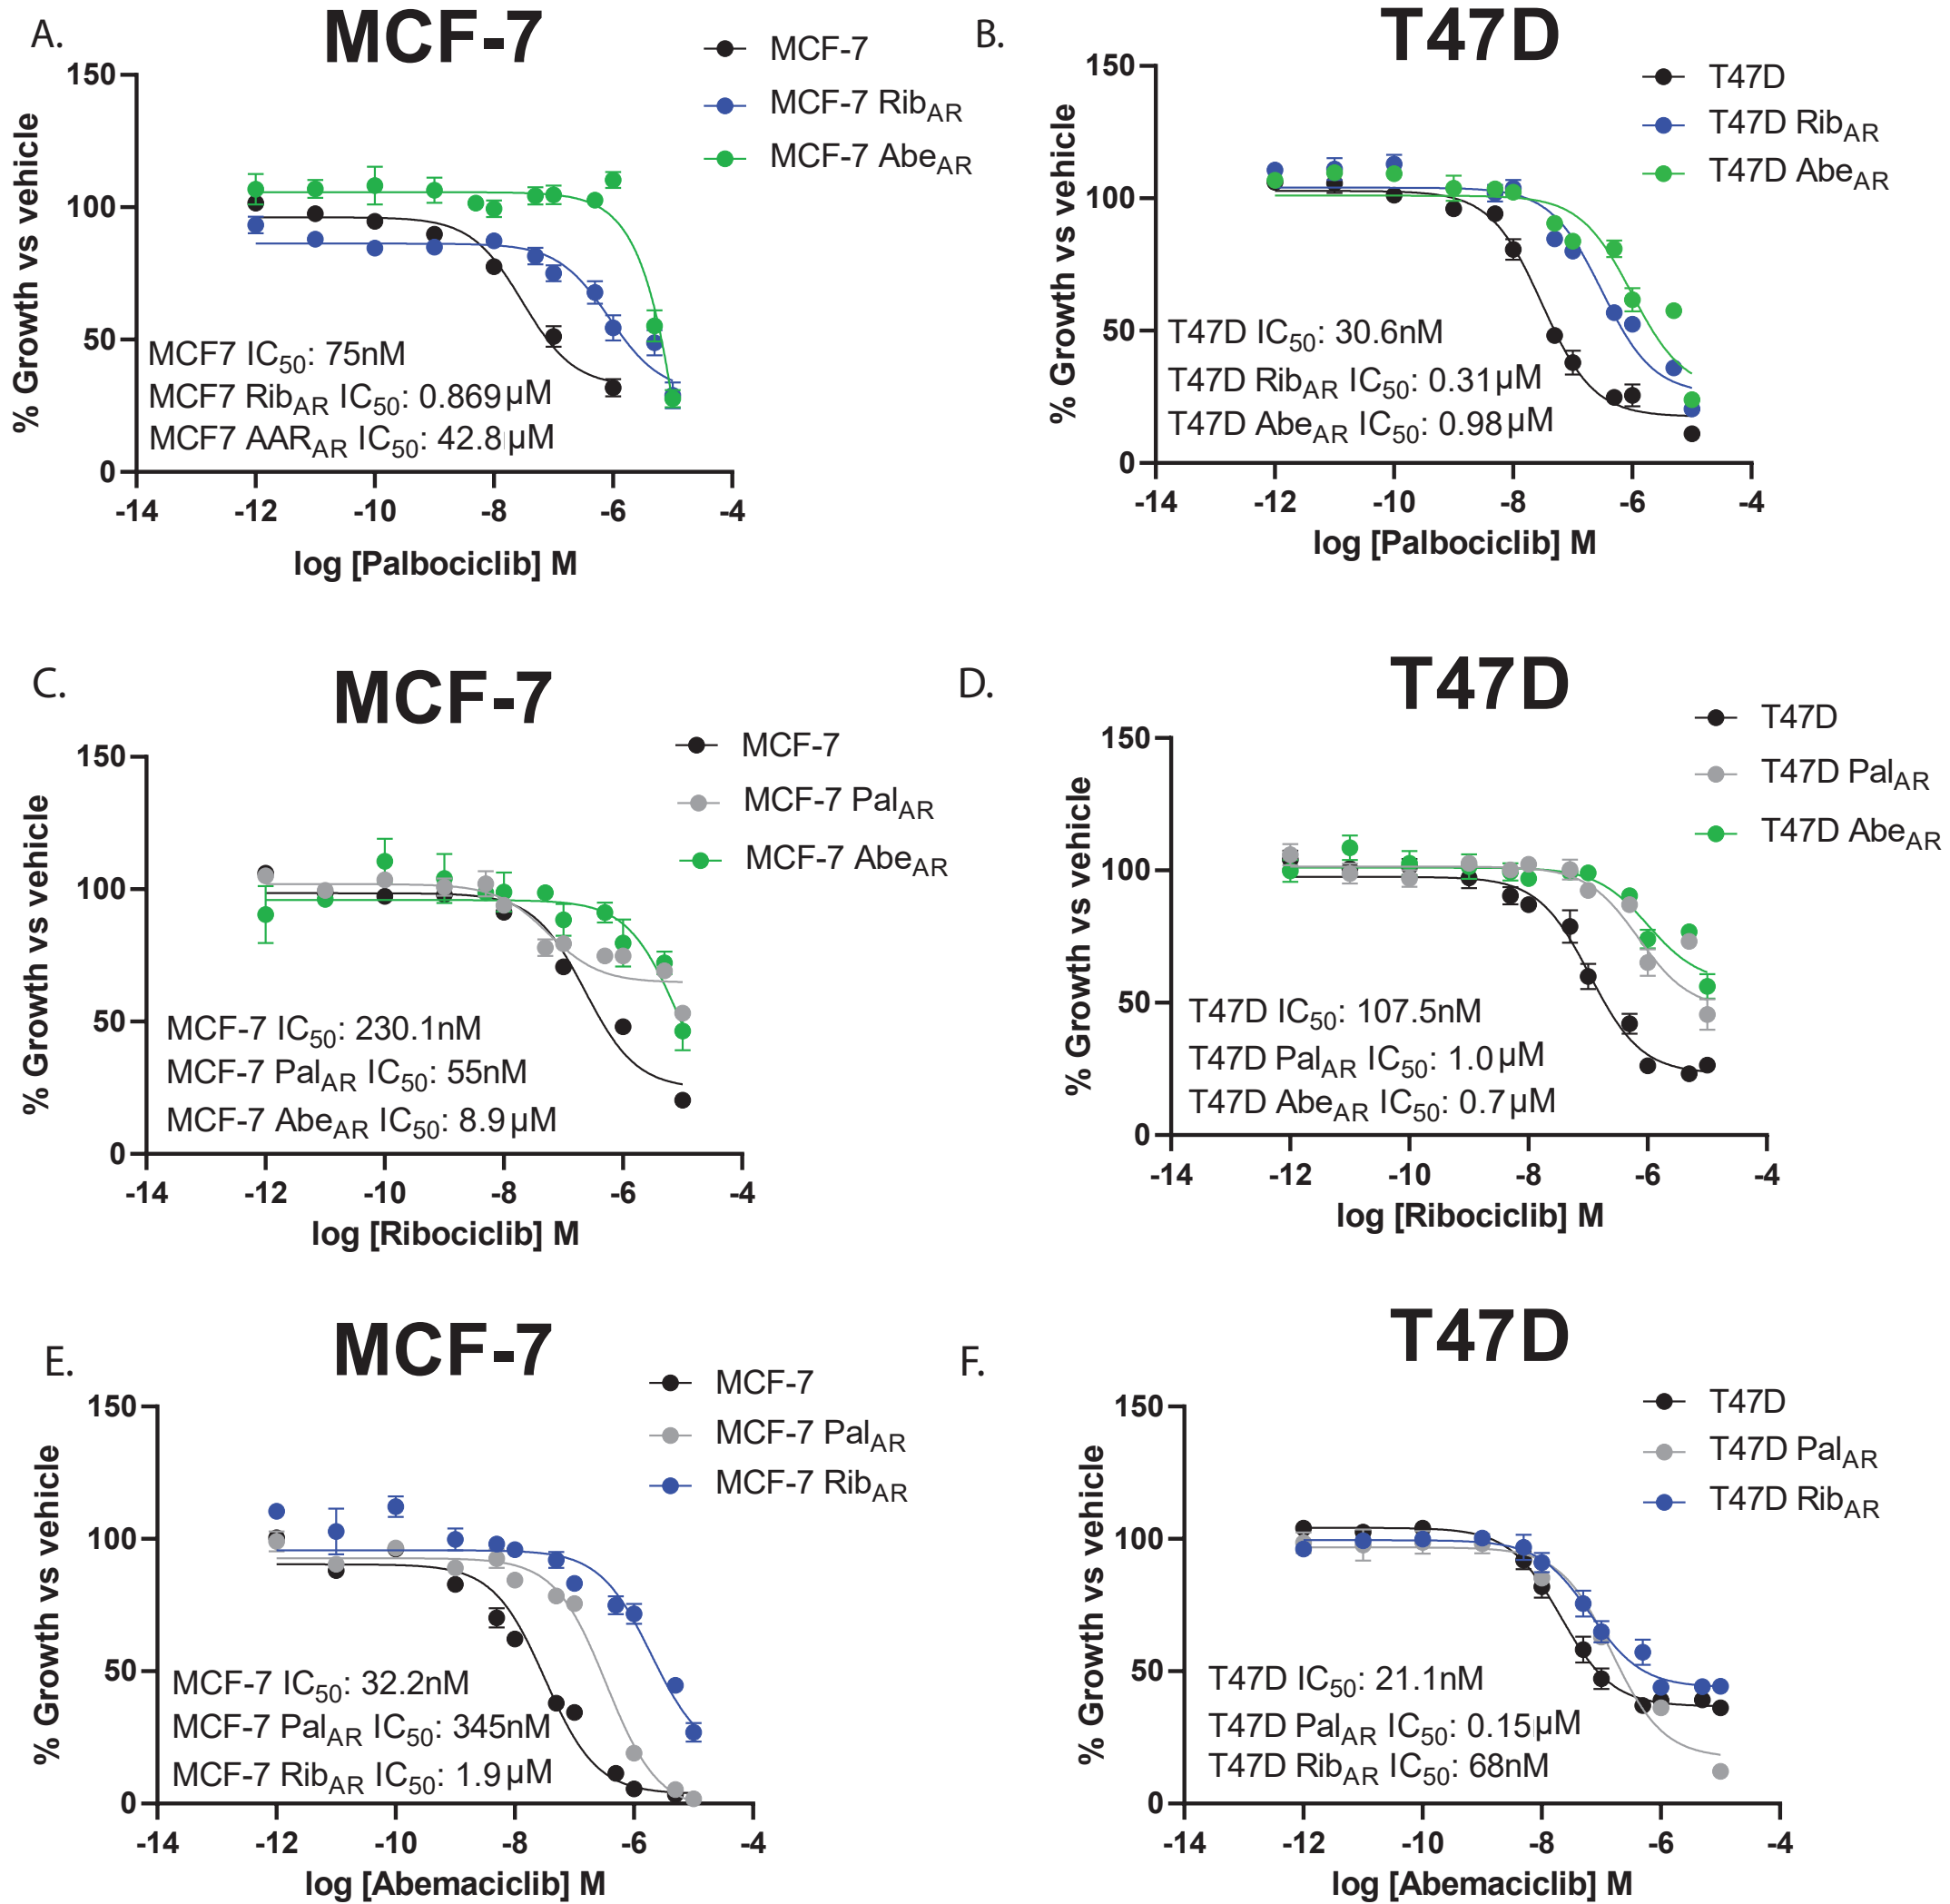



# Supplemental Figure 5

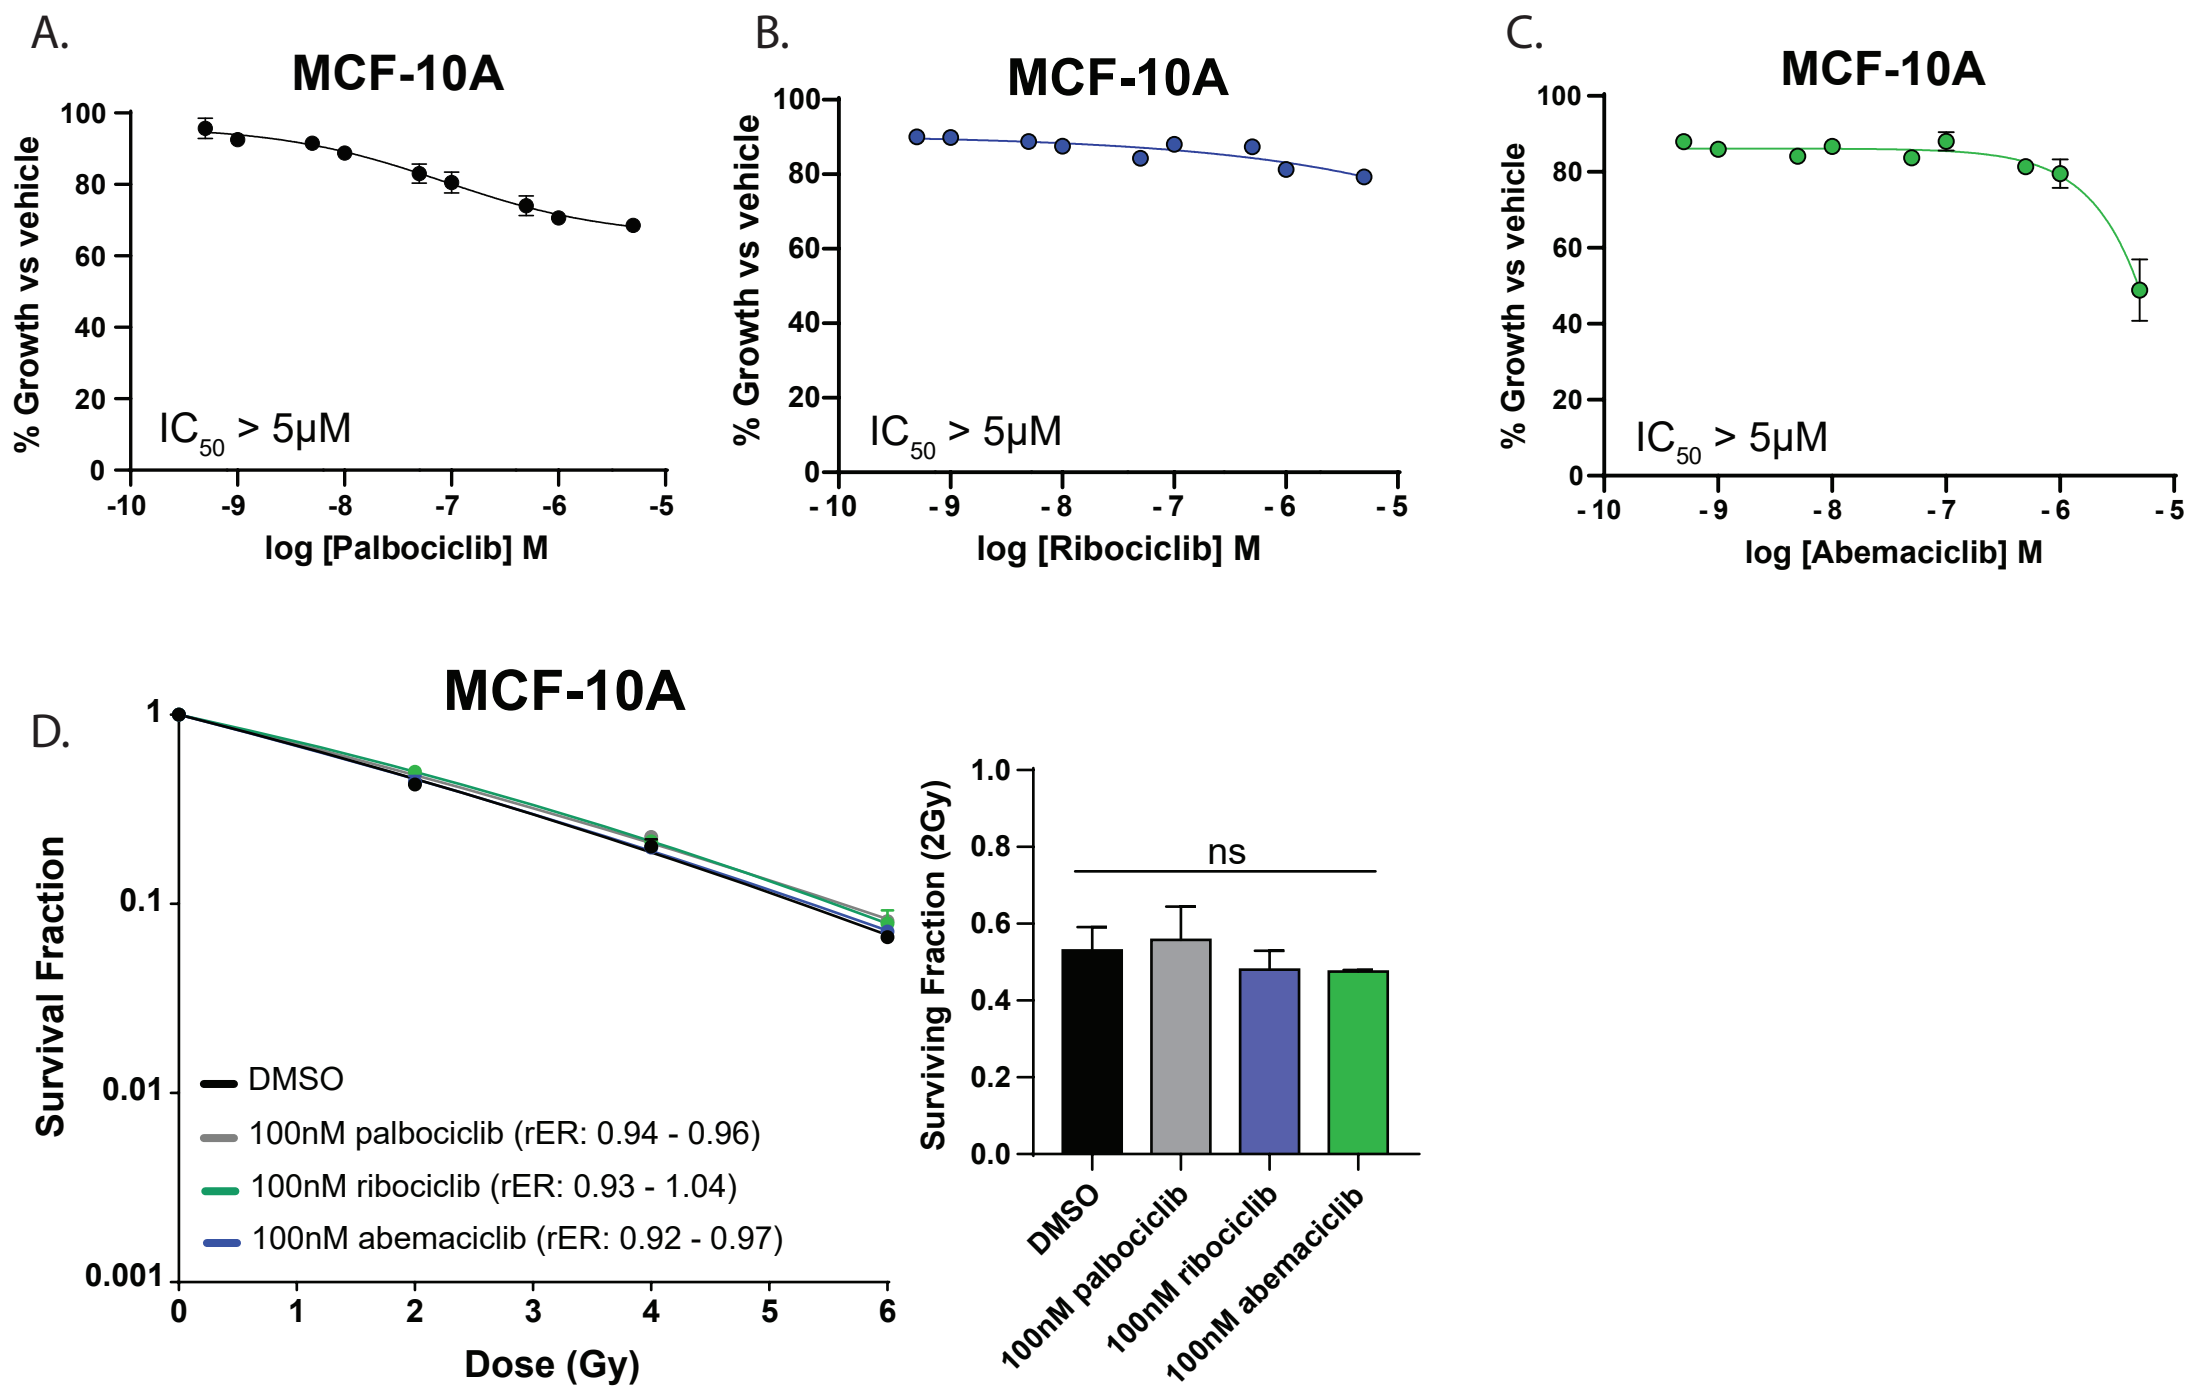



# Supplemental Figure 7

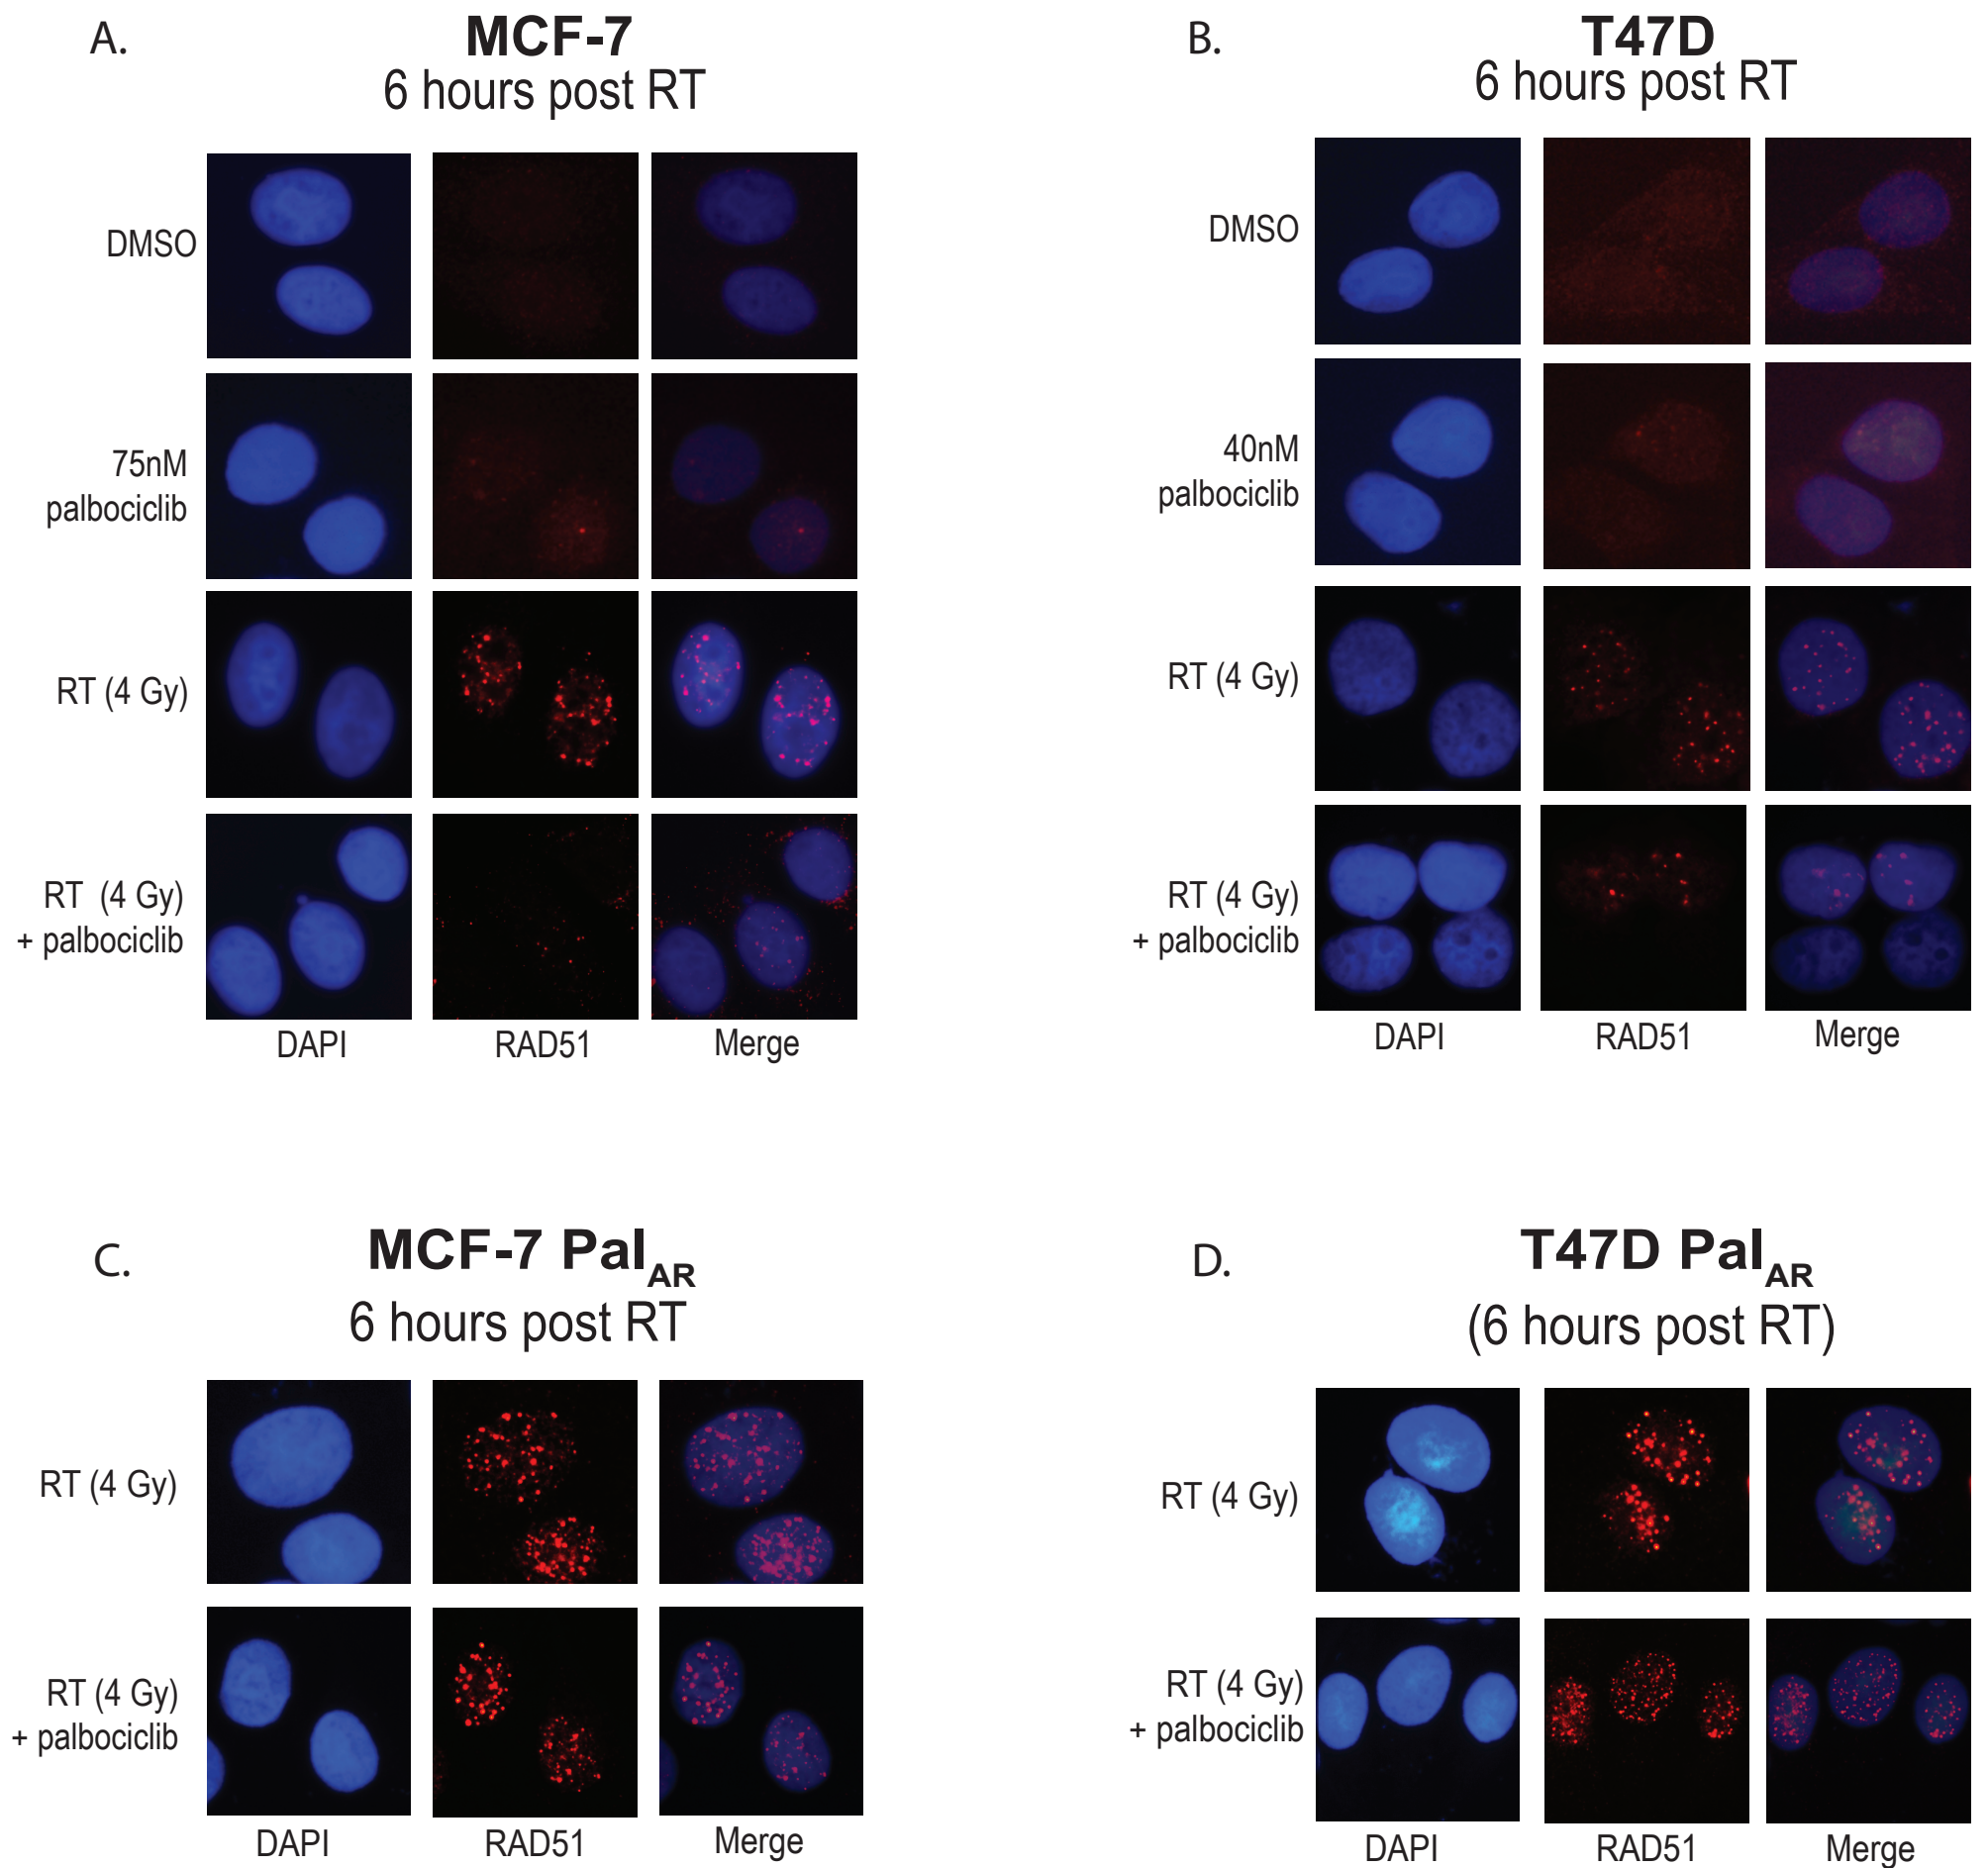



# Supplemental Figure 8

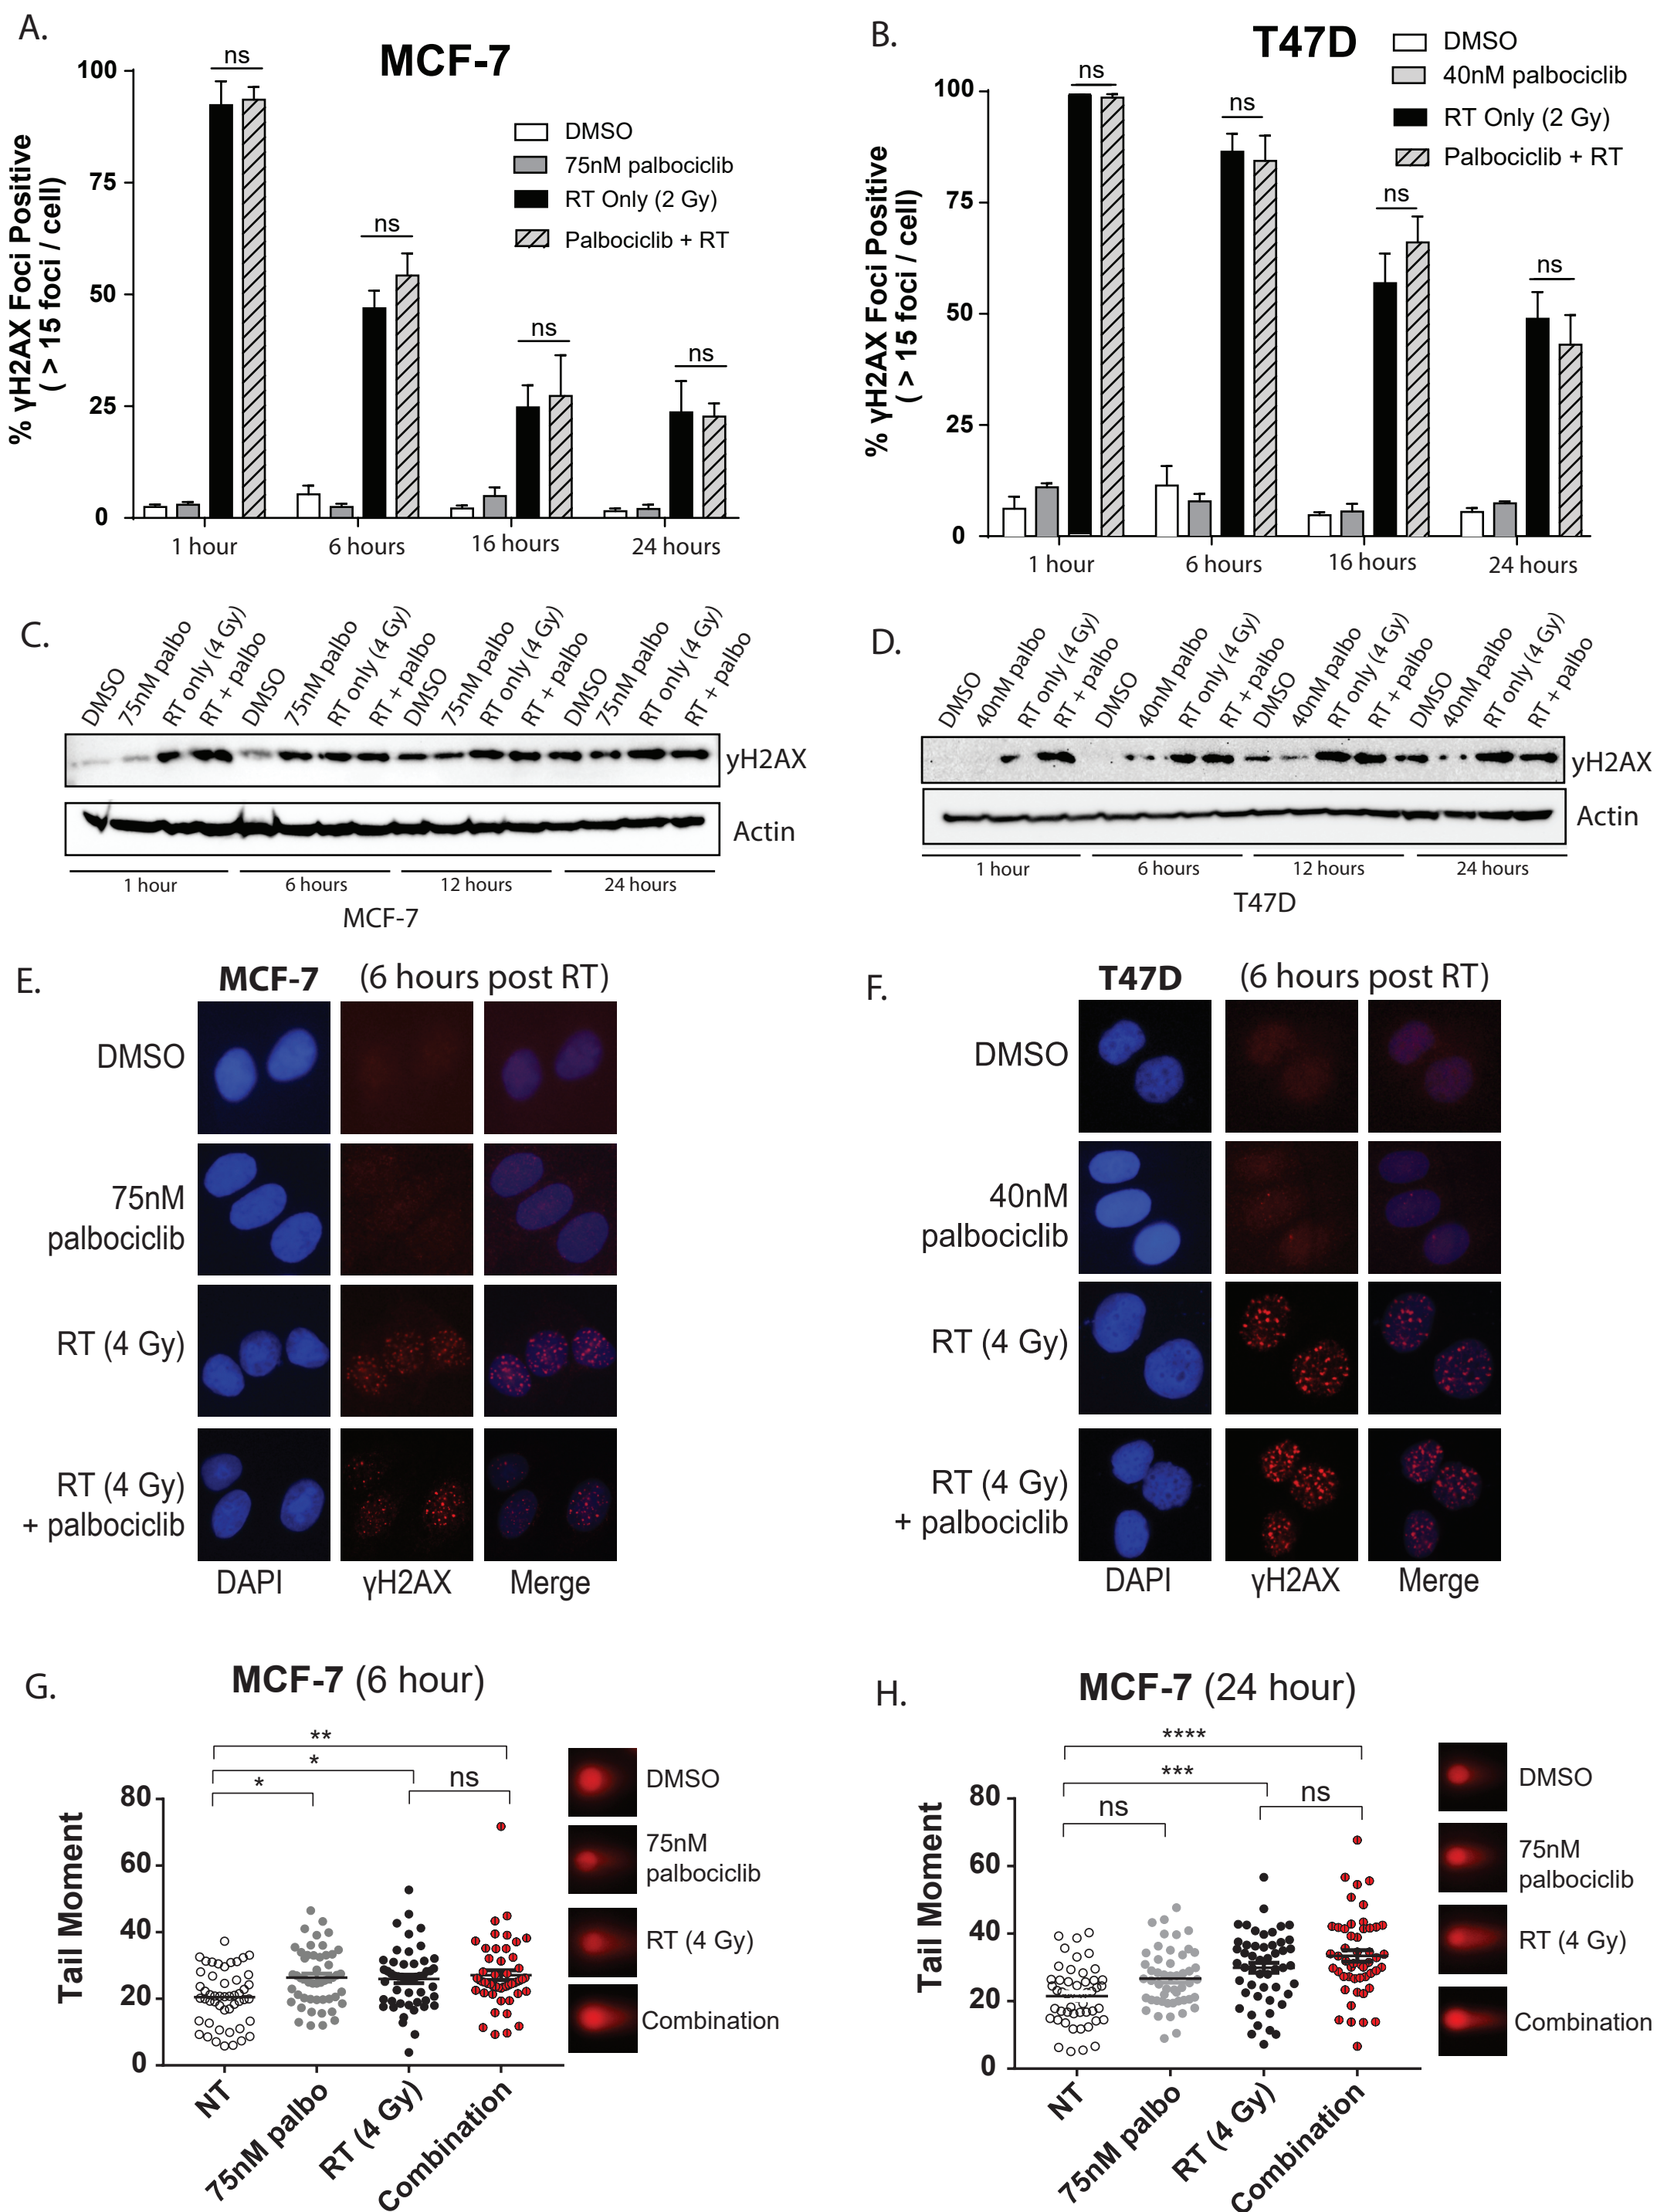

# Supplemental Figure 9

A.

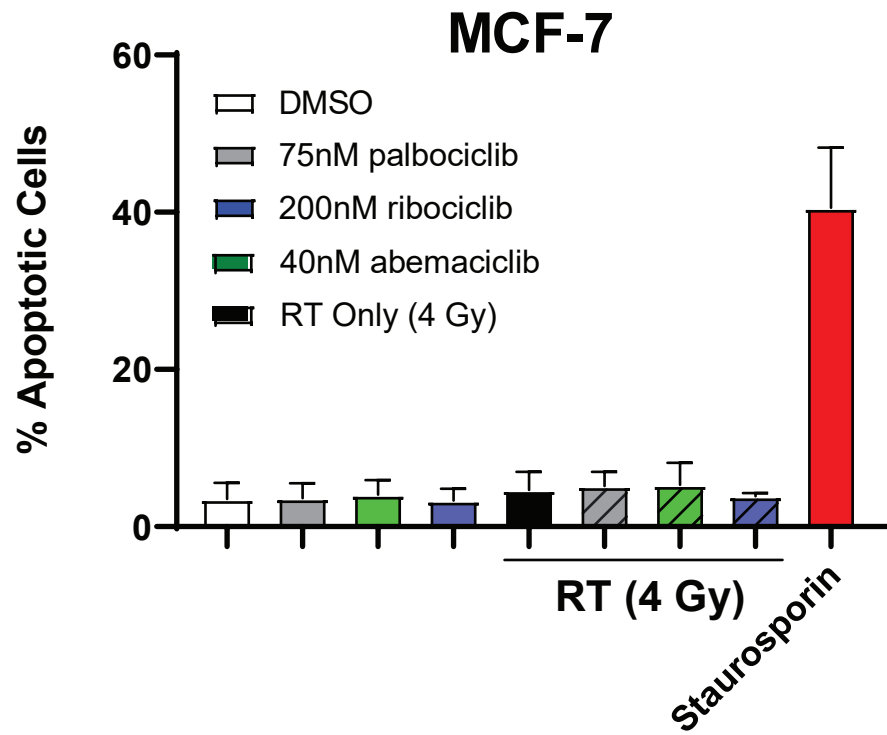

B.

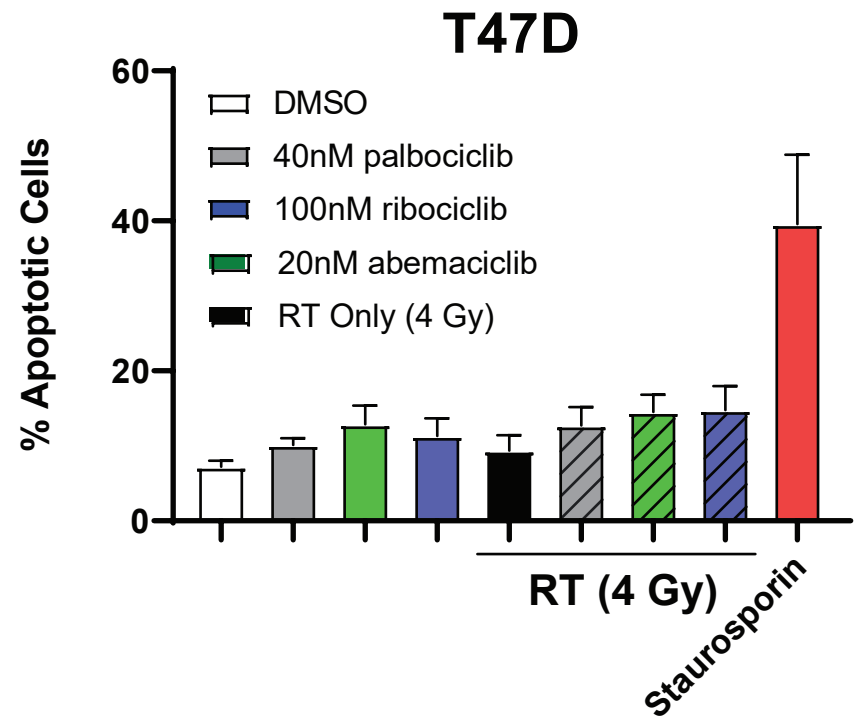

C.

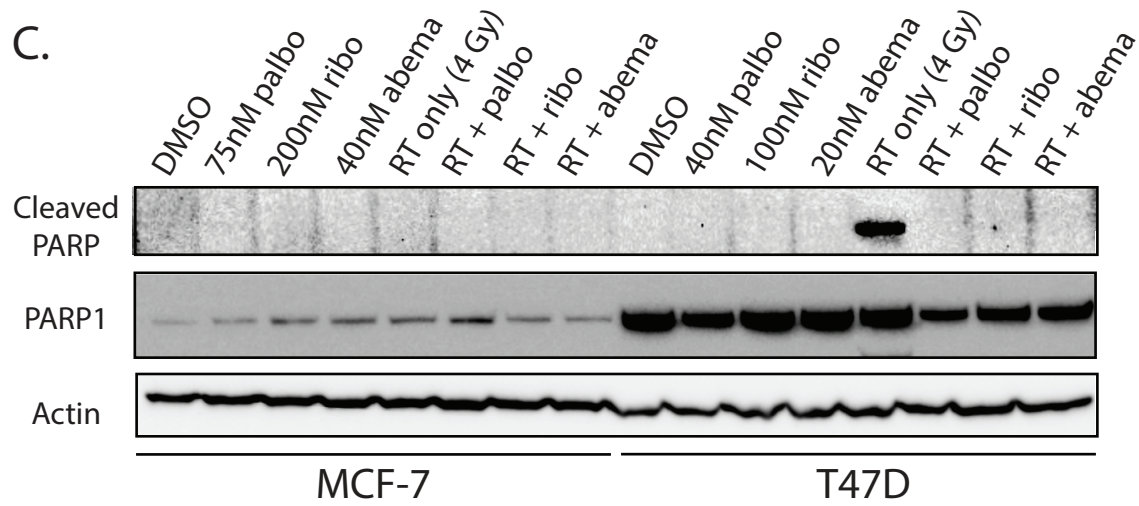

# Supplemental Table 1

A. **MCF-7 Clonogenic Survival Assay (Palbociclib)**

| Treatment          | Enhancement Ratio | Cytotoxicity |
|--------------------|-------------------|--------------|
| DMSO               | 1.0               | 1.0          |
| 50 nM palbociclib  | 1.22 ± 0.06       | 0.70 ± 0.12  |
| 75 nM palbociclib  | 1.31 ± 0.06       | 0.67 ± 0.14  |
| 100 nM palbociclib | 1.52 ± 0.14       | 0.53 ± 0.08  |

B. **T47D Clonogenic Survival Assay (Palbociclib)**

| Treatment         | Enhancement Ratio | Cytotoxicity |
|-------------------|-------------------|--------------|
| DMSO              | 1.0               | 1.0          |
| 1 nM palbociclib  | 1.23 ± 0.15       | 0.99 ± 0.14  |
| 10 nM palbociclib | 1.29 ± 0.13       | 0.54 ± 0.11  |
| 25 nM palbociclib | 1.50 ± 0.13       | 0.29 ± 0.05  |

**MCF-7 Clonogenic Survival Assay (Ribociclib)**

| Treatment         | Enhancement Ratio | Cytotoxicity |
|-------------------|-------------------|--------------|
| DMSO              | 1.0               | 1.0          |
| 50 nM ribociclib  | 1.20 ± 0.05       | 0.88 ± 0.04  |
| 75 nM ribociclib  | 1.33 ± 0.02       | 0.69 ± 0.10  |
| 100 nM ribociclib | 1.58 ± 0.11       | 0.64 ± 0.02  |

**T47D Clonogenic Survival Assay (Ribociclib)**

| Treatment        | Enhancement Ratio | Cytotoxicity |
|------------------|-------------------|--------------|
| DMSO             | 1.0               | 1.0          |
| 10 nM ribociclib | 1.20 ± 0.12       | 0.85 ± 0.13  |
| 25 nM ribociclib | 1.28 ± 0.11       | 0.78 ± 0.15  |
| 50 nM ribociclib | 1.58 ± 0.07       | 0.57 ± 0.15  |

**MCF-7 Clonogenic Survival Assay (Abemaciclib)**

| Treatment          | Enhancement Ratio | Cytotoxicity |
|--------------------|-------------------|--------------|
| DMSO               | 1.0               | 1.0          |
| 50 nM abemaciclib  | 1.34 ± 0.05       | 0.78 ± 0.05  |
| 75 nM abemaciclib  | 1.51 ± 0.15       | 0.80 ± 0.09  |
| 100 nM abemaciclib | 1.59 ± 0.13       | 0.44 ± 0.06  |

**T47D Clonogenic Survival Assay (Abemaciclib)**

| Treatment         | Enhancement Ratio | Cytotoxicity |
|-------------------|-------------------|--------------|
| DMSO              | 1.0               | 1.0          |
| 10 nM abemaciclib | 1.31 ± 0.11       | 0.88 ± 0.22  |
| 25 nM abemaciclib | 1.38 ± 0.23       | 0.74 ± 0.20  |
| 50nM abemaciclib  | 1.81 ± 0.26       | 0.69 ± 0.11  |

C. **CAMA-1 Clonogenic Survival Assay (Palbociclib)**

| Treatment        | Enhancement Ratio | Cytotoxicity |
|------------------|-------------------|--------------|
| DMSO             | 1.0               | 1.0          |
| 25nM palbociclib | 1.17 ± 0.04       | 0.92 ± 0.13  |
| 50nM palbociclib | 1.16 ± 0.06       | 0.72 ± 0.05  |
| 75nM palbociclib | 1.30 ± 0.09       | 0.51 ± 0.10  |

D. **ZR-75-1 Clonogenic Assay (Palbociclib)**

| Treatment          | Enhancement Ratio | Cytotoxicity |
|--------------------|-------------------|--------------|
| DMSO               | 1.0               | 1.0          |
| 50 nM palbociclib  | 1.21 ± 0.15       | 0.81 ± 0.14  |
| 100 nM palbociclib | 1.27 ± 0.14       | 0.47 ± 0.16  |



# Supplemental Table 2

A. **MCF-7 Pal<sub>AR</sub> Clonogenic Assay (Palbociclib)**

| Treatment         | Enhancement Ratio | Cytotoxicity |
|-------------------|-------------------|--------------|
| DMSO              | 1.0               | 1.0          |
| 100nM palbociclib | 1.03 ± 0.07       | 0.95 ± 0.04  |
| 500nM palbociclib | 0.95 ± 0.05       | 0.82 ± 0.13  |

B. **T47D Pal<sub>AR</sub> Clonogenic Assay (Palbociclib)**

| Treatment         | Enhancement Ratio | Cytotoxicity |
|-------------------|-------------------|--------------|
| DMSO              | 1.0               | 1.0          |
| 100nM palbociclib | 0.90 ± 0.07       | 0.75 ± 0.17  |
| 250nM palbociclib | 0.92 ± 0.08       | 0.70 ± 0.32  |

C. **MCF-7 Rib<sub>AR</sub> Clonogenic Assay (Ribociclib)**

| Treatment        | Enhancement Ratio | Cytotoxicity |
|------------------|-------------------|--------------|
| DMSO             | 1.0               | 1.0          |
| 100nM ribociclib | 0.97 ± 0.11       | 0.75 ± 0.19  |
| 500nM ribociclib | 1.03 ± 0.04       | 0.85 ± 0.06  |

D. **T47D Rib<sub>AR</sub> Clonogenic Assay (Ribociclib)**

| Treatment        | Enhancement Ratio | Cytotoxicity |
|------------------|-------------------|--------------|
| DMSO             | 1.0               | 1.0          |
| 100nM ribociclib | 1.08 ± 0.07       | 0.47 ± 0.11  |
| 250nM ribociclib | 1.01 ± 0.11       | 0.33 ± 0.13  |

E. **MCF-7 Abe<sub>AR</sub> Clonogenic Assay (Abemaciclib)**

| Treatment         | Enhancement Ratio | Cytotoxicity |
|-------------------|-------------------|--------------|
| DMSO              | 1.0               | 1.0          |
| 100nM abemaciclib | 0.96 ± 0.08       | 0.85 ± 0.08  |
| 500nM abemaciclib | 0.92 ± 0.11       | 0.81 ± 0.26  |

F. **T47D Abe<sub>AR</sub> Clonogenic Assay (Abemaciclib)**

| Treatment         | Enhancement Ratio | Cytotoxicity |
|-------------------|-------------------|--------------|
| DMSO              | 1.0               | 1.0          |
| 100nM abemaciclib | 1.06 ± 0.06       | 0.95 ± 0.16  |
| 250nM abemaciclib | 1.10 ± 0.06       | 0.58 ± 0.15  |

# Supplemental Table 3

A. **MCF-10A Clonogenic Assay**

| Treatment         | Enhancement Ratio | Cytotoxicity |
|-------------------|-------------------|--------------|
| DMSO              | 1.0               | 1.0          |
| 100nM palbociclib | 0.95 ± 0.01       | 0.47 ± 0.13  |
| 100nM ribociclib  | 0.99 ± 0.08       | 0.87 ± 0.09  |
| 100nM abemaciclib | 0.95 ± 0.02       | 0.54 ± 0.03  |

# Supplemental Table 4

**MCF-7 Clonogenic Assay (6 hour pretreatment)**

| Treatment          | Enhancement Ratio | Cytotoxicity |
|--------------------|-------------------|--------------|
| DMSO               | 1.0               | 1.0          |
| 50 nM palbociclib  | 1.33 ± 0.05       | 0.81 ± 0.10  |
| 75 nM palbociclib  | 1.37 ± 0.17       | 0.66 ± 0.06  |
| 100 nM palbociclib | 1.57 ± 0.02       | 0.64 ± 0.11  |

B. **MCF-7 Clonogenic Assay (24 hour pretreatment)**

| Treatment          | Enhancement Ratio | Cytotoxicity |
|--------------------|-------------------|--------------|
| DMSO               | 1.0               | 1.0          |
| 50 nM palbociclib  | 1.29 ± 0.07       | 0.74 ± 0.16  |
| 75 nM palbociclib  | 1.33 ± 0.11       | 0.67 ± 0.16  |
| 100 nM palbociclib | 1.48 ± 0.20       | 0.59 ± 0.10  |

# Supplemental Table 5

A. **MCF-7 Clonogenic Assay (NU7441, AZD7762)**

| Treatment        | Enhancement Ratio | Cytotoxicity |
|------------------|-------------------|--------------|
| DMSO             | 1.0               | 1.0          |
| 75nM palbociclib | 1.35 ± 0.11       | 0.83 ± 0.07  |
| 500nM NU7441     | 1.97 ± 0.71       | 0.99 ± 0.19  |
| NU7441 + palbo   | 2.70 ± 0.87       | 0.85 ± 0.04  |
| 100nM AZD7762    | 1.60 ± 0.29       | 0.24 ± 0.05  |
| AZD7762 + palbo  | 1.36 ± 0.13       | 0.28 ± 0.04  |

B. **MCF-7 Clonogenic Assay (siNT, siRAD51, siXRCC6)**

| Treatment         | Enhancement Ratio | Cytotoxicity |
|-------------------|-------------------|--------------|
| siNT              | 1.0               | 1.0          |
| siNT + 75nM palbo | 1.33 ± 0.11       | 0.79 ± 0.18  |
| siXRCC6           | 1.44 ± 0.26       | 0.36 ± 0.20  |
| siXRCC6 + palbo   | 2.08 ± 0.34       | 0.15 ± 0.15  |
| siRAD51           | 1.69 ± 0.51       | 0.09 ± 0.05  |
| siRAD51 + palbo   | 1.87 ± 0.58       | 0.04 ± 0.03  |

C. **T47D Clonogenic Assay (NU7441)**

| Treatment        | Enhancement Ratio | Cytotoxicity |
|------------------|-------------------|--------------|
| DMSO             | 1.0               | 1.0          |
| 10nM palbociclib | 1.29 ± 0.17       | 1.26 ± 0.15  |
| 500nM NU7441     | 2.22 ± 0.70       | 1.03 ± 0.60  |
| NU7441 + palbo   | 2.51 ± 0.09       | 1.28 ± 0.36  |

D. **MCF7 Pal<sub>AR</sub> Clonogenic Assay (NU7441)**

| Treatment        | Enhancement Ratio | Cytotoxicity |
|------------------|-------------------|--------------|
| DMSO             | 1.0               | 1.0          |
| 75nM palbociclib | 0.89 ± 0.08       | 0.82 ± 0.06  |
| 500nM NU7441     | 1.67 ± 0.19       | 0.91 ± 0.09  |
| NU7441 + palbo   | 1.88 ± 0.24       | 0.89 ± 0.09  |

# Supplemental Table 6

| MCF-7 Xenografts (FTV) |       |       | Combination |          |       |
|------------------------|-------|-------|-------------|----------|-------|
| Day                    | RT    | Palbo | Expected    | Observed | Ratio |
| 9                      | 0.822 | 0.795 | 0.654       | 0.671    | 0.974 |
| 26                     | 0.584 | 0.704 | 0.411       | 0.373    | 1.103 |
| 38                     | 0.558 | 0.699 | 0.390       | 0.358    | 1.090 |
| 61                     | 0.505 | 0.674 | 0.340       | 0.323    | 1.055 |
| 77                     | 0.499 | 0.759 | 0.379       | 0.286    | 1.326 |
